# Supplementary material for: The Interaction between CLSPN Gene Polymorphisms and Alcohol Consumption Contributes to Oral Cancer Progression
Source: MDPI journal article supplement (doi:10.3390/ijms25021098), 2024-01-16
Supplement: s1 [file s1]

Supplementary Table S1

The distribution of CLSPN SNP genotype frequencies among alcohol drinkers in control and OSCC groups.

| Variable          | Control (N=8) | Patients (N=116) | AOR <sup>a</sup> (95% CI) | <i>p</i> Value |
|-------------------|---------------|------------------|---------------------------|----------------|
| <b>rs12058760</b> |               |                  |                           |                |
| CC                | 7 (87.5%)     | 101 (87.1%)      | 1.000 (reference)         |                |
| CG                | 1 (12.5%)     | 15 (12.9%)       | 0.790 (0.068–9.201)       | 0.850          |
| GG                | -             | -                | -                         | -              |
| CG+GG             | 1 (12.5%)     | 15 (12.9%)       | 0.790 (0.068–9.201)       | 0.850          |
| <b>rs16822339</b> |               |                  |                           |                |
| AA                | 5 (62.5%)     | 63 (54.3%)       | 1.000 (reference)         |                |
| AC                | 3 (37.5%)     | 43 (37.1%)       | 0.800 (0.142–4.492)       | 0.800          |
| CC                | 0 (0.0%)      | 10 (8.6%)        | -                         | -              |
| AC + CC           | 3 (37.5%)     | 53 (45.7%)       | 1.006 (0.187–5.409)       | 0.995          |
| <b>rs535638</b>   |               |                  |                           |                |
| CC                | 6 (75.0%)     | 70 (60.3%)       | 1.000 (reference)         |                |
| CT                | 2 (25.0%)     | 44 (37.9%)       | 1.543 (0.250–9.531)       | 0.640          |
| TT                | 0 (0.0%)      | 2 (1.7%)         | -                         | -              |
| CT + TT           | 2 (25.0%)     | 46 (39.7%)       | 1.557 (0.252–9.615)       | 0.633          |
| <b>rs7520495</b>  |               |                  |                           |                |
| CC                | 3 (37.5%)     | 12 (10.3%)       | 1.000 (reference)         |                |
| CG                | 5 (62.5%)     | 87 (75.0%)       | 3.633 (0.562–23.485)      | 0.176          |
| GG                | 0 (0.0%)      | 17 (14.7%)       | -                         | -              |
| CG + GG           | 5 (62.5%)     | 104 (89.7%)      | 4.315 (0.674–27.643)      | 0.123          |

N: number. <sup>a</sup> The adjusted odds ratio (AOR) with their 95% confidence intervals were estimated by multiple logistic regression models after controlling for betel nut chewing and tobacco consumption. \* *p* value < 0.05 as statistically significant.

Supplementary Table S2

The distribution of CLSPN SNP genotype frequencies among non-alcohol drinkers in control and OSCC groups.

| Variable          | Control (N=296) | Patients (N=286) | AOR <sup>a</sup> (95% CI) | <i>p</i> Value |
|-------------------|-----------------|------------------|---------------------------|----------------|
| <b>rs12058760</b> |                 |                  |                           |                |
| CC                | 261 (88.2%)     | 259 (90.6%)      | 1.000 (reference)         |                |
| CG                | 34 (11.5%)      | 25 (8.7%)        | 0.791 (0.369–1.696)       | 0.547          |
| GG                | 1 (0.3%)        | 2 (0.7%)         | 4.124 (0.295–57.74)       | 0.293          |
| CG+GG             | 35 (11.8%)      | 27 (9.4%)        | 0.886 (0.428–1.834)       | 0.744          |
| <b>rs16822339</b> |                 |                  |                           |                |
| AA                | 177 (59.8%)     | 153 (53.5%)      | 1.000 (reference)         |                |
| AC                | 100 (33.8%)     | 120 (42.0%)      | 1.133 (0.704–1.824)       | 0.606          |
| CC                | 19 (6.4%)       | 13 (4.5%)        | 1.384 (0.557–3.438)       | 0.484          |
| AC + CC           | 119 (40.2%)     | 133 (46.5%)      | 1.169 (0.744–1.837)       | 0.499          |
| <b>rs535638</b>   |                 |                  |                           |                |
| CC                | 203 (68.6%)     | 177 (61.9%)      | 1.000 (reference)         |                |
| CT                | 83 (28.0%)      | 101 (35.3%)      | 1.309 (0.807–2.125)       | 0.275          |
| TT                | 10 (3.4%)       | 8 (2.8%)         | 1.016 (0.271–3.810)       | 0.982          |
| CT + TT           | 93 (31.4%)      | 109 (38.1%)      | 1.280 (0.800–2.047)       | 0.303          |
| <b>rs7520495</b>  |                 |                  |                           |                |
| CC                | 118 (39.9%)     | 102 (35.7%)      | 1.000 (reference)         |                |
| CG                | 138 (46.6%)     | 140 (49.0%)      | 1.244 (0.762–2.031)       | 0.382          |
| GG                | 40 (13.5%)      | 44 (15.4%)       | 1.381 (0.688–2.774)       | 0.364          |
| CG + GG           | 178 (60.1%)     | 184 (64.3%)      | 1.274 (0.799–2.030)       | 0.309          |

N: number. <sup>a</sup> The adjusted odds ratio (AOR) with their 95% confidence intervals were estimated by multiple logistic regression models after controlling for betel nut chewing and tobacco consumption. \* *p* value < 0.05 as statistically significant.

Supplementary Table S3

The distribution of CLSPN SNP genotype frequencies among betel nut eaters in control and OSCC groups.

| Variable          | Control (N=11) | Patients (N=258) | AOR <sup>a</sup> (95% CI) | <i>p</i> Value |
|-------------------|----------------|------------------|---------------------------|----------------|
| <b>rs12058760</b> |                |                  |                           |                |
| CC                | 9 (81.8%)      | 232 (89.9%)      | 1.000 (reference)         |                |
| CG                | 2 (18.2%)      | 26 (10.1%)       | 0.405 (0.080–2.058)       | 0.276          |
| GG                | -              | -                | -                         | -              |
| CG+GG             | 2 (18.2%)      | 26 (10.1%)       | 0.405 (0.080–2.058)       | 0.276          |
| <b>rs16822339</b> |                |                  |                           |                |
| AA                | 5 (45.5%)      | 134 (51.9%)      | 1.000 (reference)         |                |
| AC                | 6 (54.5%)      | 111 (43.0%)      | 0.700 (0.206–2.375)       | 0.568          |
| CC                | 0 (0.0%)       | 13 (5.0%)        | -                         | -              |
| AC + CC           | 6 (54.5%)      | 124 (48.1%)      | 0.756 (0.223–2.563)       | 0.654          |
| <b>rs535638</b>   |                |                  |                           |                |
| CC                | 7 (63.6%)      | 154 (59.7%)      | 1.000 (reference)         |                |
| CT                | 4 (36.4%)      | 97 (37.6%)       | 1.079 (0.305–3.819)       | 0.906          |
| TT                | 0 (0.0%)       | 7 (2.7%)         | -                         | -              |
| CT + TT           | 4 (36.4%)      | 104 (40.3%)      | 1.163 (0.329–4.109)       | 0.815          |
| <b>rs7520495</b>  |                |                  |                           |                |
| CC                | 4 (36.4%)      | 71 (27.5%)       | 1.000 (reference)         |                |
| CG                | 5 (45.5%)      | 148 (57.4%)      | 1.144 (0.289–4.526)       | 0.848          |
| GG                | 2 (18.2%)      | 39 (15.1%)       | 0.837 (0.142–4.923)       | 0.844          |
| CG + GG           | 7 (63.6%)      | 187 (72.5%)      | 1.054 (0.292–3.809)       | 0.936          |

N: number. <sup>a</sup> The adjusted odds ratio (AOR) with their 95% confidence intervals were estimated by multiple logistic regression models after controlling for alcohol and tobacco consumption. \* *p* value < 0.05 as statistically significant.

Supplementary Table S4

The distribution of CLSPN SNP genotype frequencies among non-betel nut eaters in control and OSCC groups.

| Variable          | Control (N=293) | Patients (N=144) | AOR <sup>a</sup> (95% CI) | <i>p</i> Value |
|-------------------|-----------------|------------------|---------------------------|----------------|
| <b>rs12058760</b> |                 |                  |                           |                |
| CC                | 259 (88.4%)     | 128 (88.9%)      | 1.000 (reference)         |                |
| CG                | 33 (11.3%)      | 14 (9.7%)        | 0.941 (0.439–2.016)       | 0.875          |
| GG                | 1 (0.3%)        | 2 (1.4%)         | 4.232 (0.297–60.29)       | 0.287          |
| CG+GG             | 34 (11.6%)      | 16 (11.1%)       | 1.040 (0.502–2.154)       | 0.916          |
| <b>rs16822339</b> |                 |                  |                           |                |
| AA                | 177 (60.4%)     | 82 (56.9%)       | 1.000 (reference)         |                |
| AC                | 97 (33.1%)      | 52 (36.1%)       | 1.228 (0.746–2.021)       | 0.420          |
| CC                | 19 (6.5%)       | 10 (6.9%)        | 1.443 (0.574–3.628)       | 0.435          |
| AC + CC           | 116 (39.6%)     | 62 (43.1%)       | 1.261 (0.786–2.022)       | 0.337          |
| <b>rs535638</b>   |                 |                  |                           |                |
| CC                | 202 (68.9%)     | 93 (64.6%)       | 1.000 (reference)         |                |
| CT                | 81 (27.6%)      | 48 (33.3%)       | 1.360 (0.820–2.255)       | 0.234          |
| TT                | 10 (3.4%)       | 3 (2.1%)         | 0.941 (0.226–3.915)       | 0.933          |
| CT + TT           | 91 (31.1%)      | 51 (35.4%)       | 1.317 (0.806–2.152)       | 0.272          |
| <b>rs7520495</b>  |                 |                  |                           |                |
| CC                | 117 (39.9%)     | 43 (29.9%)       | 1.000 (reference)         |                |
| CG                | 138 (47.1%)     | 79 (54.9%)       | 1.344 (0.797–2.268)       | 0.267          |
| GG                | 38 (13.0%)      | 22 (15.3%)       | 1.783 (0.872–3.647)       | 0.113          |
| CG + GG           | 176 (60.1%)     | 101 (70.1%)      | 1.435 (0.873–2.358)       | 0.154          |

N: number. <sup>a</sup> The adjusted odds ratio (AOR) with their 95% confidence intervals were estimated by multiple logistic regression models after controlling for alcohol and tobacco consumption. \* *p* value < 0.05 as statistically significant.

Supplementary Table S5

The distribution of CLSPN SNP genotype frequencies among smokers in control and OSCC groups.

| Variable          | Control (N=23) | Patients (N=312) | AOR <sup>a</sup> (95% CI) | <i>p</i> Value |
|-------------------|----------------|------------------|---------------------------|----------------|
| <b>rs12058760</b> |                |                  |                           |                |
| CC                | 21 (91.3%)     | 279 (89.4%)      | 1.000 (reference)         |                |
| CG                | 2 (8.7%)       | 32 (10.3%)       | 1.082 (0.233–5.021)       | 0.920          |
| GG                | 0 (0.0%)       | 1 (0.3%)         | -                         | -              |
| CG+GG             | 2 (8.7%)       | 33 (10.6%)       | 1.190 (0.257–5.503)       | 0.824          |
| <b>rs16822339</b> |                |                  |                           |                |
| AA                | 13 (56.5%)     | 167 (53.5%)      | 1.000 (reference)         |                |
| AC                | 10 (43.5%)     | 129 (41.3%)      | 0.928 (0.383–2.249)       | 0.868          |
| CC                | 0 (0.0%)       | 16 (5.1%)        | -                         | -              |
| AC + CC           | 10 (43.5%)     | 145 (46.5%)      | 1.044 (0.433–2.516)       | 0.924          |
| <b>rs535638</b>   |                |                  |                           |                |
| CC                | 15 (65.2%)     | 193 (61.9%)      | 1.000 (reference)         |                |
| CT                | 8 (34.8%)      | 111 (35.6%)      | 0.981 (0.393–2.448)       | 0.967          |
| TT                | 0 (0.0%)       | 8 (2.6%)         | -                         | -              |
| CT + TT           | 8 (34.8%)      | 119 (38.1%)      | 1.048 (0.421–2.610)       | 0.920          |
| <b>rs7520495</b>  |                |                  |                           |                |
| CC                | 9 (39.1%)      | 85 (27.2%)       | 1.000 (reference)         |                |
| CG                | 11 (47.8%)     | 180 (57.7%)      | 1.527 (0.583–3.996)       | 0.389          |
| GG                | 3 (13.0%)      | 47 (15.1%)       | 1.349 (0.335–5.429)       | 0.673          |
| CG + GG           | 14 (60.9%)     | 227 (72.8%)      | 1.486 (0.596–3.706)       | 0.395          |

N: number. <sup>a</sup> The adjusted odds ratio (AOR) with their 95% confidence intervals were estimated by multiple logistic regression models after controlling for betel nut chewing and alcohol consumption. \* *p* value < 0.05 as statistically significant.

Supplementary Table S6

The distribution of CLSPN SNP genotype frequencies among non-smokers in control and OSCC groups.

| Variable          | Control (N=281) | Patients (N=90) | AOR <sup>a</sup> (95% CI) | <i>p</i> Value |
|-------------------|-----------------|-----------------|---------------------------|----------------|
| <b>rs12058760</b> |                 |                 |                           |                |
| CC                | 247 (87.9%)     | 81 (90.0%)      | 1.000 (reference)         |                |
| CG                | 33 (11.7%)      | 8 (8.9%)        | 0.760 (0.320–1.809)       | 0.536          |
| GG                | 1 (0.4%)        | 1 (1.1%)        | 3.820 (0.236–61.90)       | 0.346          |
| CG+GG             | 34 (12.1%)      | 9 (10.0%)       | 0.848 (0.372–1.930)       | 0.694          |
| <b>rs16822339</b> |                 |                 |                           |                |
| AA                | 169 (60.1%)     | 49 (54.4%)      | 1.000 (reference)         |                |
| AC                | 93 (33.1%)      | 34 (37.8%)      | 1.204 (0.701–2.070)       | 0.502          |
| CC                | 19 (6.8%)       | 7 (7.8%)        | 1.343 (0.505–3.573)       | 0.554          |
| AC + CC           | 112 (39.9%)     | 41 (45.6%)      | 1.227 (0.735–2.047)       | 0.434          |
| <b>rs535638</b>   |                 |                 |                           |                |
| CC                | 194 (69.0%)     | 54 (60.0%)      | 1.000 (reference)         |                |
| CT                | 77 (27.4%)      | 34 (37.8%)      | 1.463 (0.851–2.516)       | 0.169          |
| TT                | 10 (3.6%)       | 2 (2.2%)        | 0.873 (0.185–4.124)       | 0.864          |
| CT + TT           | 87 (31.0%)      | 36 (40.0%)      | 1.397 (0.824–2.369)       | 0.214          |
| <b>rs7520495</b>  |                 |                 |                           |                |
| CC                | 112 (39.9%)     | 29 (32.2%)      | 1.000 (reference)         |                |
| CG                | 132 (47.0%)     | 47 (52.2%)      | 1.262 (0.715–2.229)       | 0.422          |
| GG                | 37 (13.2%)      | 14 (15.6%)      | 1.721 (0.805–3.677)       | 0.161          |
| CG + GG           | 169 (60.1%)     | 61 (67.8%)      | 1.361 (0.795–2.329)       | 0.262          |

N: number. <sup>a</sup> The adjusted odds ratio (AOR) with their 95% confidence intervals were estimated by multiple logistic regression models after controlling for betel nut chewing and alcohol consumption. \* *p* value < 0.05 as statistically significant.
